# Supplementary material for: PLGA-encapsulated CpG ODN and Campylobacter jejuni lysate modulate cecal microbiota composition in broiler chickens experimentally challenged with C. jejuni
Source: PubMed Central journal article supplement (PMC6089921; doi:10.1038/s41598-018-30510-w), 2018-08-13

**PLGA-encapsulated CpG ODN and *Campylobacter jejuni* lysate modulate cecal microbiota composition in broiler chickens experimentally challenged with *C. jejuni***

Khaled Taha-abdelaziz<sup>1, 2,\*</sup>, Alexander Yitbarek<sup>1\*</sup>, Tamiru Negash Alkie<sup>1,3</sup>, Douglas C. Hodgins<sup>1</sup>, Leah Read<sup>1</sup>, J. Scott Weese<sup>1</sup>, Shayan Sharif<sup>1#</sup>

<sup>1</sup>Department of Pathobiology, Ontario Veterinary College, University of Guelph, Guelph, ON, Canada N1G 2W1

<sup>2</sup>Pathology Department, Faculty of Veterinary Medicine, Beni-Suef University, Al Shamlah, 62511, Beni-Suef, Egypt

<sup>3</sup> Present address: Department of Biology, Wilfred Laurier University, Waterloo, ON, N2L 3C5, Canada

\*These authors have contributed equally.

#Corresponding author. Tel.: +1 519 824 4120x54641; fax: +1 519 824 5930.

E-mail address: shayan@uoguelph.ca (S. Sharif).

**Figure Legend:**

**Fig. S1:** Box-plots (a) and bar-plots (b) showing the effect of *C. jejuni* challenge compared to unchallenged control (UC) chickens on significant changes in the relative abundance of cecal microbiota at the genus level (Kruskal-Wallis tests, FDR-adjusted  $Q < 0.05$ ).

**Fig. S2:** Box-plots (a) and bar-plots (b) showing the effect of low (ECpGL) and high dose (ECpGH) compared to PBS-treated, *C. jejuni*-challenged control (CC) chickens on significant change in relative abundance of cecal microbiota at the genus level (Kruskal-Wallis tests, FDR-adjusted  $Q < 0.05$ ).

**Fig. S3:** Box-plots (a) and bar-plots (b) showing the effect of low (LL) and high dose (LH) of *C. jejuni* lysate-treated compared to PBS-treated, *C. jejuni*-challenged control (CC) chickens on significant changes in relative abundance of cecal microbial communities at the genus level (Kruskal-Wallis tests, FDR-adjusted  $Q < 0.05$ ).

Fig. S1

**a**

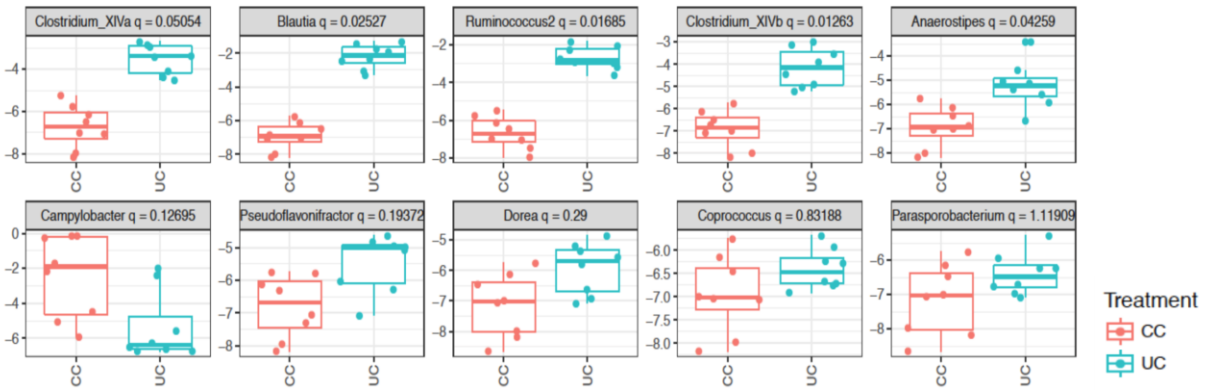

**b**

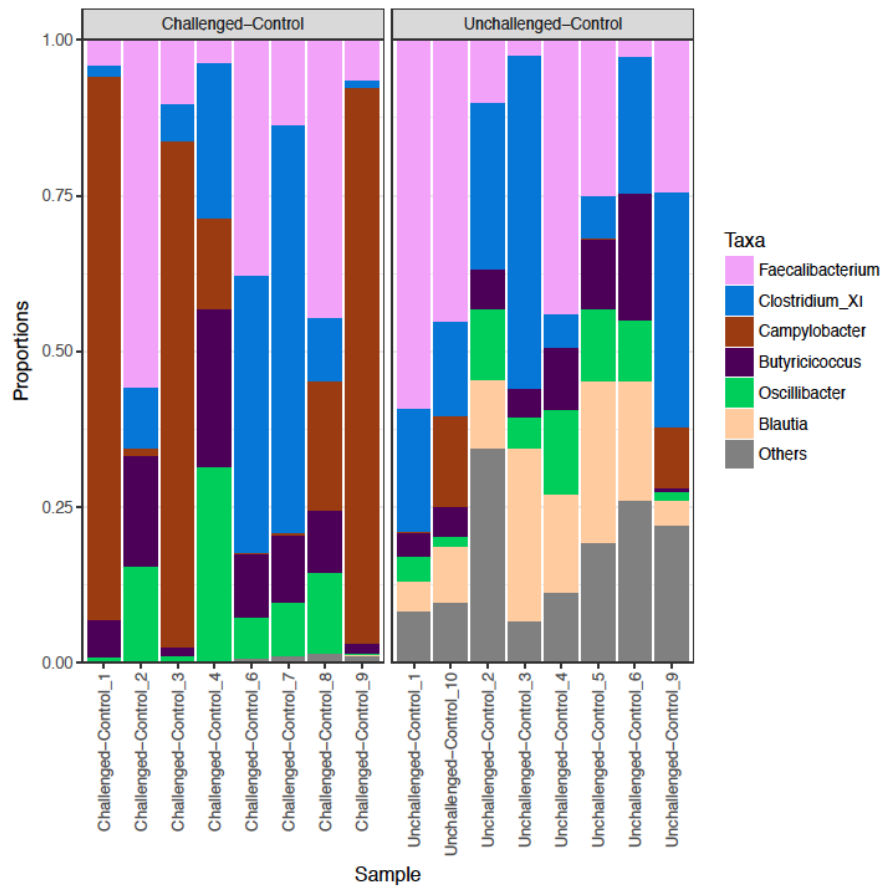

Fig. S2

**a**

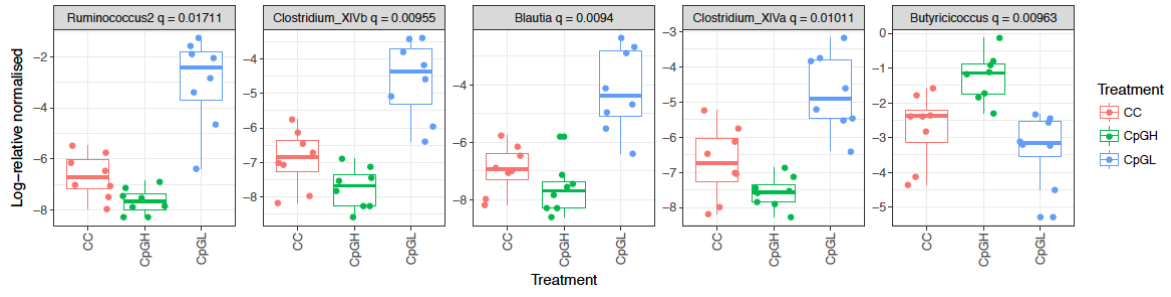

**b**

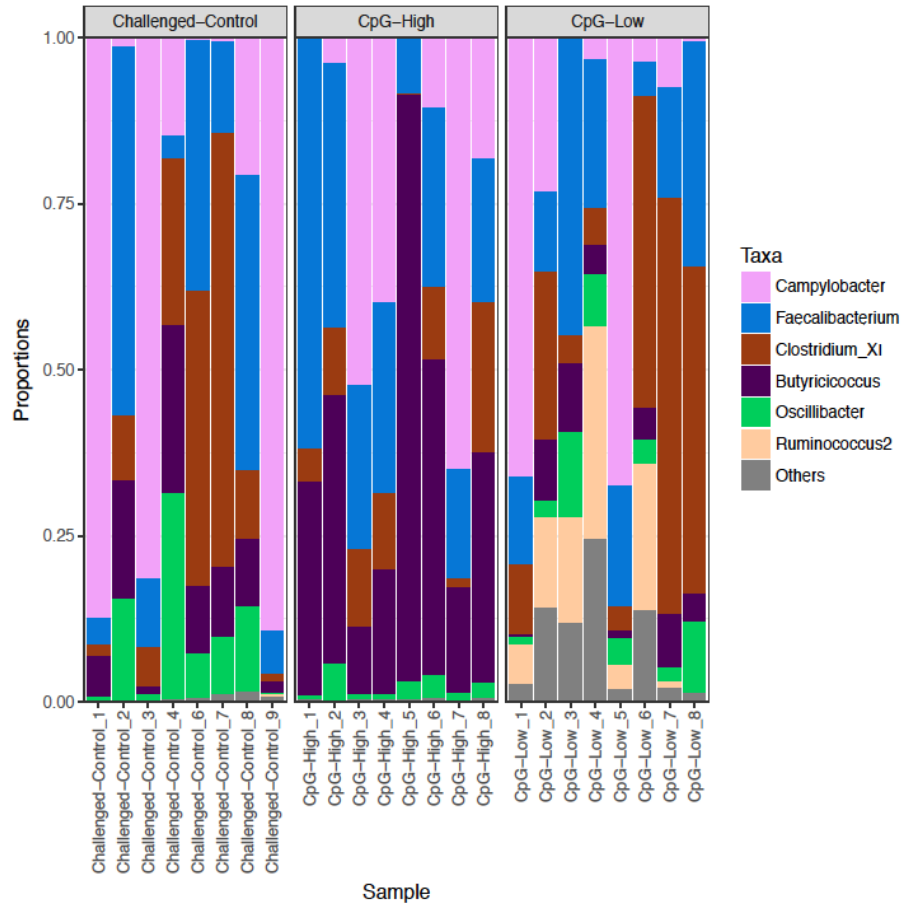

Fig. S3

**a**

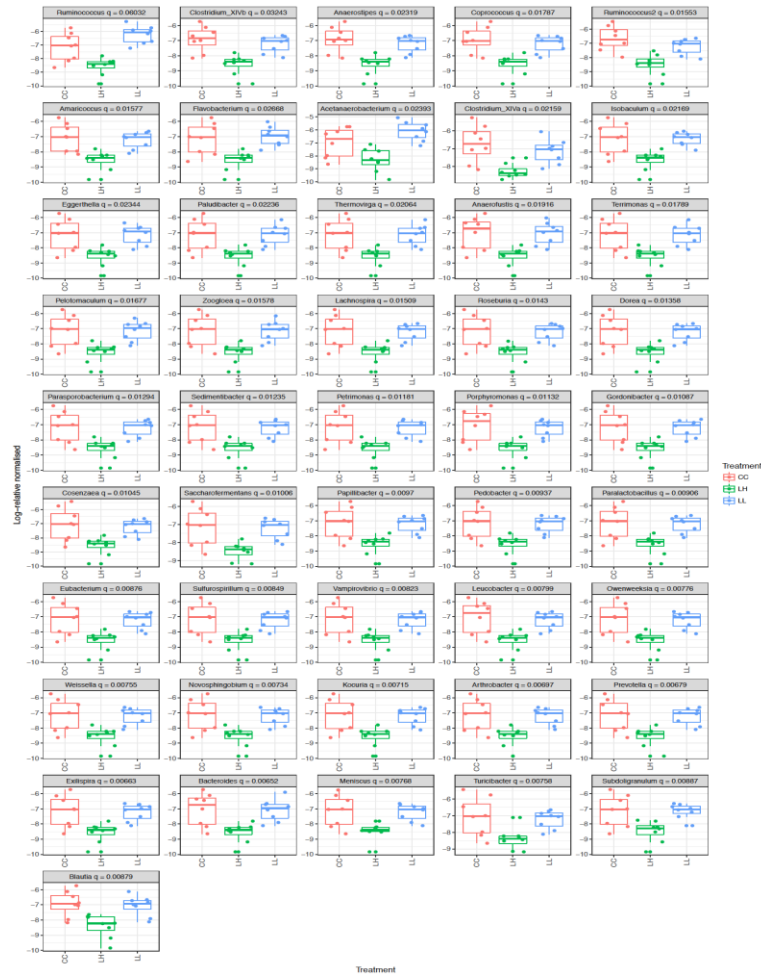

**b**

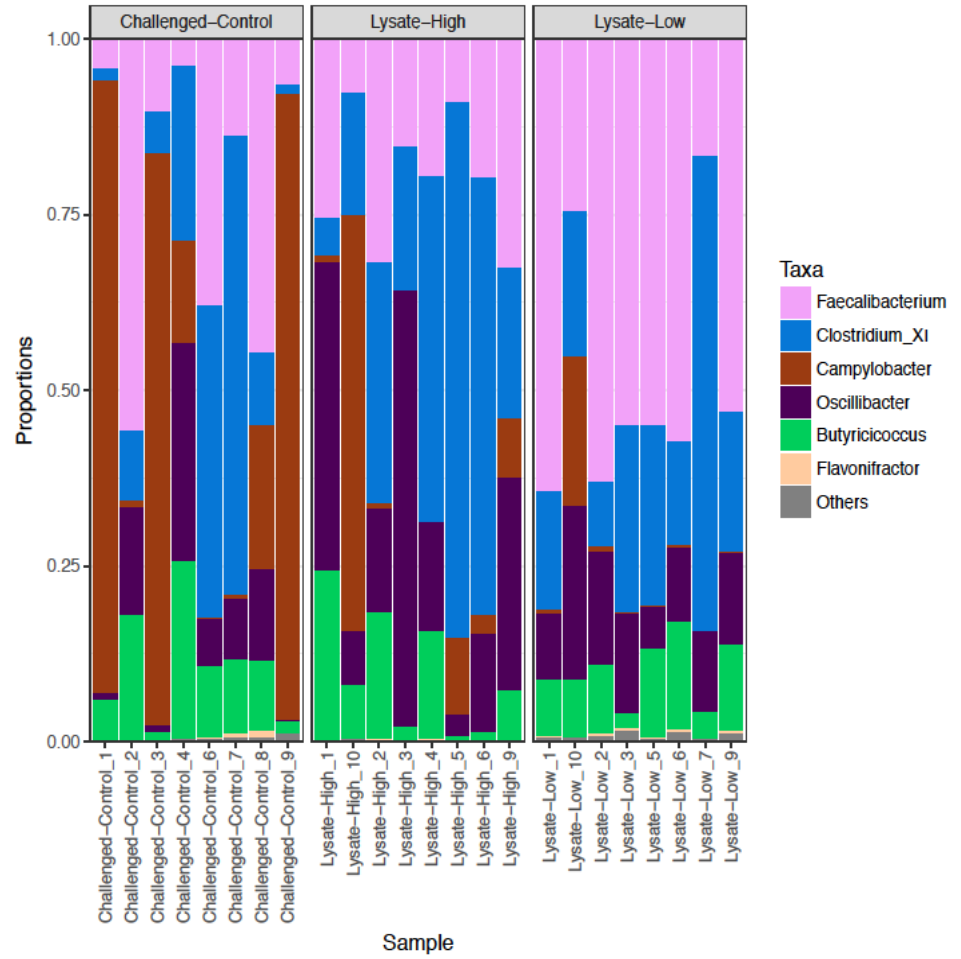

Supplement: 41598_2018_30510_MOESM1_ESM.pdf [file 41598_2018_30510_MOESM1_ESM.pdf]
